# Supplementary material
Source: MDPI journal article supplement (https://www.mdpi.com/2071-1050/13/19/10850)
Supplement: s1 [file s1]

**Table S1. Physio-chemical characterization of bacterial isolates**

| <b>Characteristic</b>            | <b><i>Chryseobacterium<br/>geocarpopshaerae</i> DD3</b> |
|----------------------------------|---------------------------------------------------------|
| Habitat                          | Coloured waste water of textile dye house               |
| Shape                            | Round fried egg colony                                  |
| Elevation                        | Flat                                                    |
| Surface                          | Smooth, slurry                                          |
| Margin                           | Circular                                                |
| Pigmentation                     | Yellowish centre with white circle                      |
| Motility                         | Aerobic Motile                                          |
| Citrate utilization              | Positive                                                |
| <b>Extracellular enzymes</b>     |                                                         |
| Catalase                         | Positive                                                |
| Amylase                          | Negative                                                |
| Protease                         | Negative                                                |
| Lipase                           | Positive                                                |
| Esterase                         | Positive                                                |
| Urease                           | Positive                                                |
| Tolerance of NaCl                | 3%                                                      |
| Tolerance to pH                  | Up to pH12.0                                            |
| <b>Carbon source utilisation</b> |                                                         |
| Cellulose                        | Negative                                                |
| Citric acid                      | Positive                                                |
| Fructose                         | Positive                                                |
| D-Glucose                        | Positive                                                |
| Galactose                        | Negative                                                |
| Lactose                          | Negative                                                |
| Sucrose                          | Negative                                                |
| G+C content (mol%)               | 48%                                                     |
| Gram character                   | Positive                                                |
| Shape                            | Small Rods                                              |
| Accession no.                    | MG905828.1                                              |
